# Supplementary material for: Anaemia and Congestion in Heart Failure: Correlations and Prognostic Role
Source: MDPI journal article supplement (doi:10.3390/biomedicines11030972), 2023-03-21
Supplement: s1 [file s1]

# Anaemia and Congestion in Heart Failure: Correlations and Prognostic Role

Pietro Scicchitano, Massimo Iacoviello, Antonio Massari, Micaela De Palo, Angela Potenza, Raffaella Landriscina, Silvia Abruzzese, Maria Tangorra, Piero Guida, Marco Matteo Ciccone, Pasquale Caldarola and Francesco Massari

**Table S1.** Comparison between AHF and CHF patients of the main differences in term of bioimpedance analysis, estimated creatinine clearance and brain natriuretic peptide.

|                                       | All           | AHF             | CHF           |
|---------------------------------------|---------------|-----------------|---------------|
| Number of patients                    | 434           | 182             | 252           |
| BIVA, hydration index, %              | 76 ± 5.5      | 78±5.5          | 74±3.4        |
| eCrCl, ml/min per 1.73 m <sup>2</sup> | 57 ± 29       | 47±25           | 64±29         |
| BNP, pg/ml, median (95% CIs)          | 516 (423-582) | 1006 (859-1247) | 258 (218-302) |

Abbreviations: AHF: acute heart failure; BIVA: bioimpedance vector analysis; BNP: brain natriuretic peptide; CHF: chronic heart failure; eCrCl: estimated creatinine clearance.
